# Supplementary material for: Achieving time-dependent and color-tunable ultralong room temperature phosphorescence through sodiation reconfiguration for dynamic 5D information encryption
Source: Royal Society of Chemistry journal article supplement (doi:10.1039/d3tc04404a), 2024-01-01
Supplement: d3tc04404a1.pdf [file d3tc04404a1.pdf]

## Supporting Information

*for*

### **Achieving Time-Dependent and Color-Tunable Ultralong Room Temperature Phosphorescence through Sodiation Reconfiguration for Dynamic 5D Information Encryption**

Li Ya Liang,<sup>a</sup> Ya Ting Gao,<sup>a</sup> Shuai Chang,<sup>a</sup> Jian Lv,<sup>a</sup> Bin Bin Chen,<sup>\*, a, b</sup> and Da Wei Li<sup>\*, a</sup>

<sup>a</sup> *Key Laboratory for Advanced Materials, Shanghai Key Laboratory of Functional Materials Chemistry, Feringa Nobel Prize Scientist Joint Research Center, Frontiers Science Center for Materiobiology & Dynamic Chemistry, School of Chemistry & Molecular Engineering, East China University of Science and Technology, Shanghai, 200237, China.*

<sup>b</sup> *School of Science and Engineering, Shenzhen Institute of Aggregate Science and Technology, The Chinese University of Hong Kong, Shenzhen (CUHK-Shenzhen), 2001 Longxiang Boulevard, Longgang District, Shenzhen City, Guangdong 518172, China.*

<sup>\*</sup> *Corresponding author. E-mail: chenbinbin@cuhk.edu.cn (B.B. Chen) and daweili@ecust.edu.cn (D.W. Li).*

## Materials and methods

**Reagent and Apparatus.** L-phenylalanine (Phe, 99%) is received from Energy Chemical Co., Ltd. Aluminum sulfate ( $\text{Al}_2(\text{SO}_4)_3$ , 99.99%) is purchased from Adamas-beta Reagent Co., Ltd. Sodium hydroxide (NaOH, 99%) is purchased from Aladdin Reagent Co., Ltd. All reagents are dissolved using 18.2 M $\Omega$ .cm ultrapure water. Photoluminescence (PL) spectra, phosphorescence (phos.) spectra and phos. lifetimes are determined by a FLS1000 steady state/transient fluorescence spectrometer. Absorption spectra is measured by a Lambda 950 UV-visible-near infrared spectrophotometer. Scanning electron microscopy (SEM) images can be obtained by a Helios G4 UC scanning electron microscope. Powder X-ray diffraction (XRD) spectrum is measured by an 18KW/D/max2550VB/PC rotating X-ray powder diffractometer. Fourier transform infrared (FT-IR) spectra are determined on a Nicolet6700 FT-IR spectrometer. X-ray photoelectron spectroscopy (XPS) spectra are analyzed using an ESCALAB 250Xi X-ray photoelectron spectrometer. Elemental mapping can be obtained by energy dispersive X-ray spectroscopy (EDS) used in combination with a field emission scanning electron microscope.

**Synthesis process of Al/Phe-PMs.** Aluminum/phenylalanine phosphorescent materials (Al/Phe-PMs) are prepared by a hydrothermal method. In detail, 0.5 mmol of Phe (0.083 g) and 4 mmol of  $\text{Al}_2(\text{SO}_4)_3$  (1.369 g) are dissolved in 4.0 mL ultrapure water by ultrasonic treatment. The mixing solution is further transferred into a 10 mL screw-neck glass bottle and heated to 200 °C for 300 min. The obtained products are designated as Al/Phe-PMs for utilization. For large-scale synthesis of Al/Phe-PMs, Phe (82.6 g) and  $\text{Al}_2(\text{SO}_4)_3 \cdot 18\text{H}_2\text{O}$  (2 kg) are mixed with water (4 L). Then the solution is dispensed in two 4 L beakers and heated at 200 °C for 17 h, rendering it feasible to achieve large-scale production of Al/Phe-PMs.

**Synthesis of Al/Phe-PMs@NaOH.** In order to prepare NaOH-treated Al/Phe-PMs (Al/Phe-PMs@NaOH), 40 mg of Al/Phe-PMs solid powder is dispersed in 1.0 M NaOH solution (2 mL) through 60 min of ultrasound. Then, Al/Phe-PMs@NaOH powder can be formed by heating the mixing solution in a vacuum drying oven at 90 °C for 15 h. To investigate the effect of the volume and concentration of NaOH solution on the phos. emission of the Al/Phe-PMs@NaOH, a series of NaOH solutions with different volumes or concentrations are used. When exploring the influence of the volume, the volume of NaOH solution (1.0 M) is 0 mL, 1 mL, 2 mL, and 3 mL, respectively. When the influence of the concentration is studied, the concentration of NaOH solution (2 mL) is expressed as 0 mM, 0.1 mM, 1 mM, 10 mM, 0.1 M, and 1.0 M, respectively.

**Synthesis of Phe@NaOH.** A facile thermal polymerization method is used to synthesize NaOH-treated Phe (Phe@NaOH). In detail, 40 mg of Phe is dispersed in 1.0 M NaOH solution (2 mL) through ultrasonic treatment. Next, with the treatment of heating and drying the mixed solution at 90 °C for 15 h, Phe@NaOH powder is obtained for further utilization.

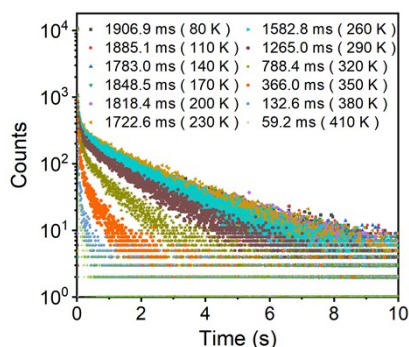

**Figure S1.** The phos. lifetimes of the Al/Phe-PMs at different temperatures. EX: 290 nm, EM: 540 nm. Result shows that the phos. lifetimes of the Al/Phe-PMs decrease as the temperature increases.

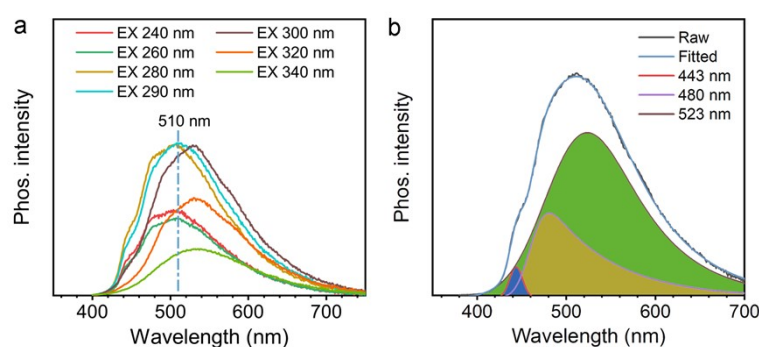

**Figure S2.** (a) Phos. emission spectra of Phe powder excited by different excitation wavelengths at room temperature. Result shows that Phe powder has a maximum phos. emission at about 510 nm when excited by 290 nm. (b) Peak fitting of phos. emission peak excited at 290 nm. Delay time: 5 ms.

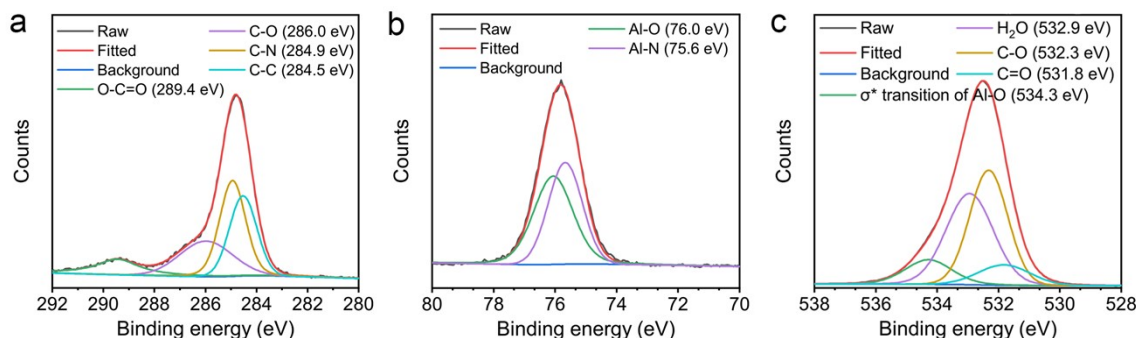

**Figure S3.** Structural analysis of Al/Phe-PMs. (a) High-resolution C1s spectrum, (b) high-resolution Al2p spectrum, and (c) high-resolution O1s spectrum of Al/Phe-PMs. Results show that many carboxylate groups exist in Al/Phe-PMs due to the characteristic binding energy of 289.4 eV in high-resolution C1s spectrum. High-resolution Al2p spectrum further reveals that Al<sup>3+</sup> ions not only coordinate with carboxyl groups through Al–O bonds, but can also coordinate with amino groups through Al–N bonds. Moreover, a typical peak located at 534.3 eV corresponding to the  $\sigma^*$  transition of Al–O bond is found in high-resolution O1s spectrum.

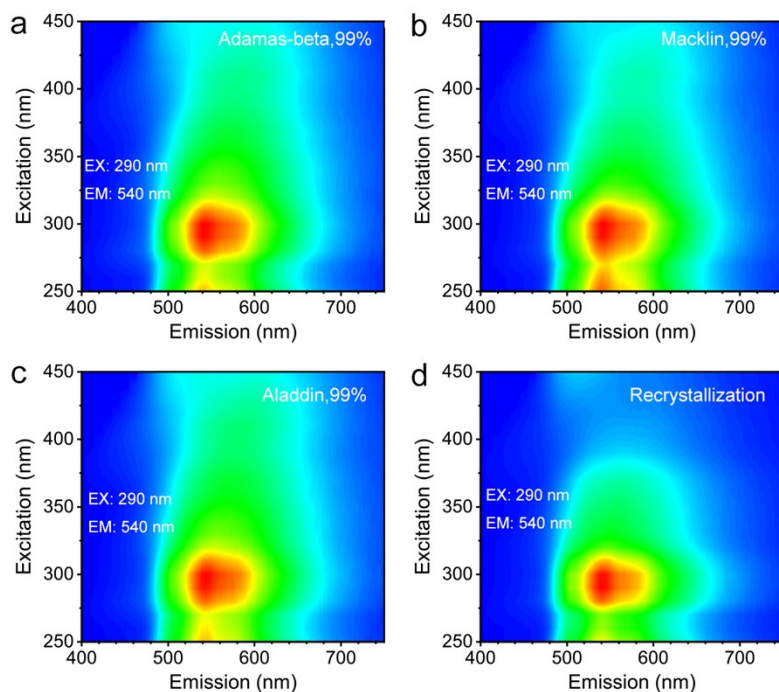

**Figure S4.** 3D phos. spectra of the Al/Phe-PMs prepared using (a-c) Phe ligands with a purity of 99% from different manufacturers and (d) recrystallized Phe ligands. Results show that there is no significant difference in the phos. spectra of the prepared Al/Phe-PMs, whether using Phe from different manufacturers or recrystallized Phe. Delay time: 5 ms.

**Table S1.** The comparison of phos. efficiency of common RTP materials.  $\phi_{\text{Phos.}}$  refers to the phos. QYs.  $\tau_{\text{Phos.}}$  refers to the phos. lifetime.

| RTP materials            | $\phi_{\text{Phos.}}$ (%) | $\tau_{\text{Phos.}}$ (s) | Ref.      |
|--------------------------|---------------------------|---------------------------|-----------|
| TSP crystals             | 66.9                      | 0.17                      | 1         |
| CDs-4                    | 47.0                      | 0.63                      | 2         |
| syn-BTCz-doped PVA films | 29.8                      | 0.85                      | 3         |
| IbCzA-doped PVA film     | 19.8                      | 1.81                      | 4         |
| TMA                      | 18.2                      | 0.16                      | 5         |
| Py-BOH-PVA               | 13.1                      | 0.34                      | 6         |
| CNQDs                    | 10.5                      | 6.47                      | 7         |
| Phe9-B-R                 | 9.4                       | 2.67                      | 8         |
| CT5-0                    | 9.3                       | 1.13                      | 9         |
| DPCz-doped PVA           | 0.3                       | 1.94                      | 10        |
| Al/Phe-PMs               | 7.98                      | 1.0153                    | This work |

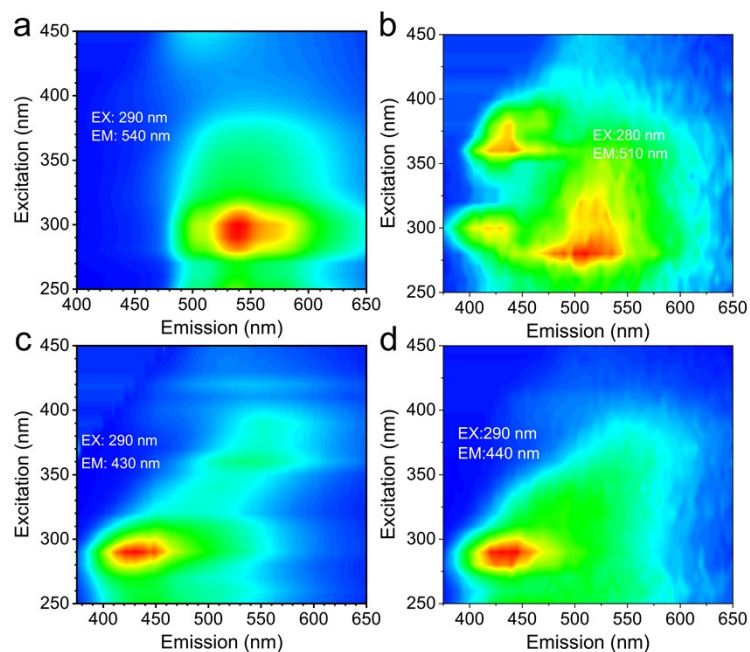

**Figure S5.** The 3D phos. spectra of Al/Phe-PMs@NaOH prepared by using different volumes of 1.0 M NaOH (from a to d: 0 mL, 1 mL, 2 mL, and 3 mL). Results show that the phos. emission of the material gradually blueshifts with the increase of the NaOH volume, and reaches a plateau at the volume of 2 mL. Delay time: 5 ms.

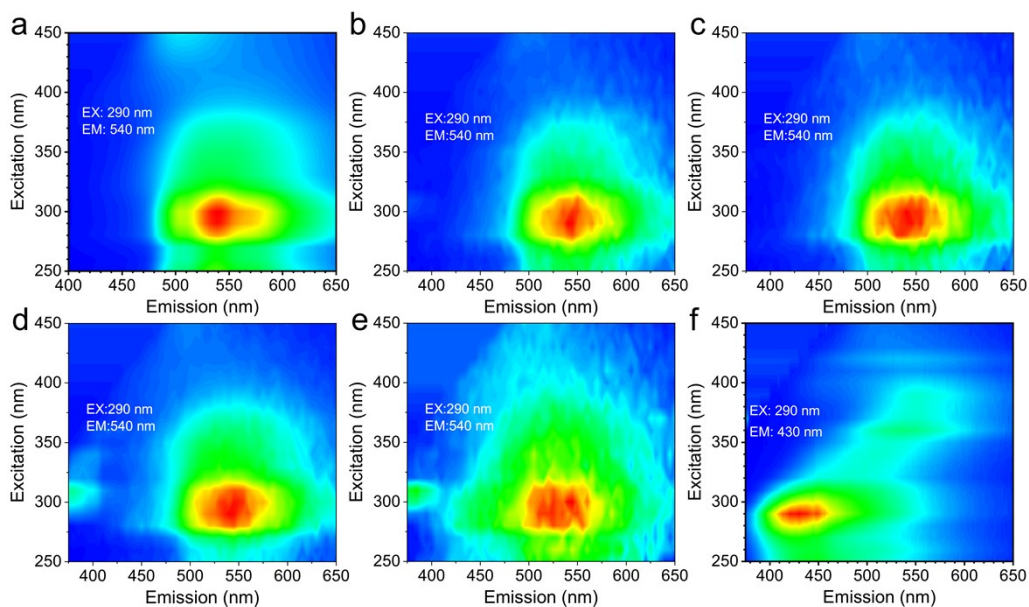

**Figure S6.** The 3D phos. spectra of Al/Phe-PMs@NaOH prepared by using different concentrations of NaOH (from a to f: control, 0.1 mM, 1 mM, 0.01 M, 0.1 M, and 1.0 M). Results show that the phos. emission of the material blueshifts to 430 nm when the concentration of NaOH is 1.0 M. Volume: 2 mL. Delay time: 5 ms.

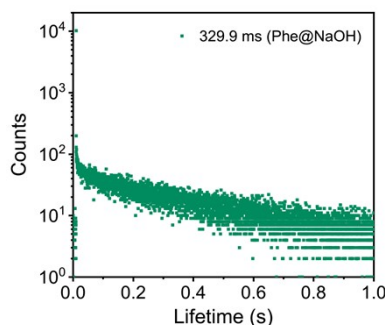

**Figure S7.** Phos. lifetime of Phe@NaOH at room temperature. Result shows that the phos. lifetime of Phe@NaOH is close to that of Al/Phe-PMs@NaOH.

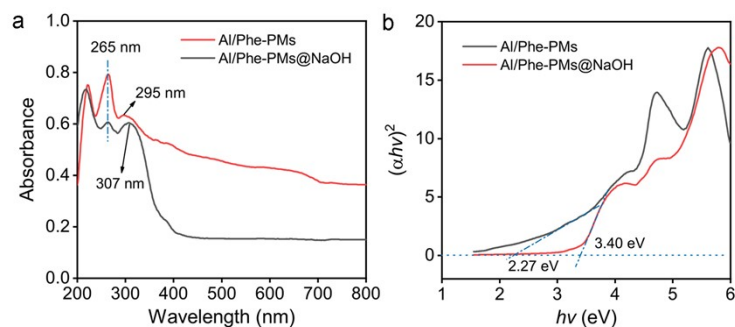

**Figure S8.** (a) Absorption spectra and (b) the  $(\alpha hv)^2 - hv$  curves of Al/Phe-PMs and Al/Phe-PMs@NaOH. Results show that Al/Phe-PMs have a stronger and wider absorption band from 400 to 800 nm as compared to Al/Phe-PMs@NaOH, indicates the destruction of rigid configuration caused by NaOH, accompanied by an increase in optical bandgap from 2.27 eV to 3.40 eV.

**Table S2.** The photophysical rate constants of Al/Phe-PMs before and after the treatment of NaOH.

|                 | $\phi_{\text{Phos.}}$ (%) | $\tau_{\text{Phos.}}$ (ms) | $k_r$ ( $\text{s}^{-1}$ ) | $k_{\text{nr}}$ ( $\text{s}^{-1}$ ) |
|-----------------|---------------------------|----------------------------|---------------------------|-------------------------------------|
| Al/Phe-PMs      | 7.98                      | 1015.3                     | $7.86 \times 10^{-2}$     | 0.91                                |
| Al/Phe-PMs@NaOH | 1.22                      | 393.1                      | $3.10 \times 10^{-2}$     | 2.51                                |

The phos. radiative rate constant of Al/Phe-PMs is calculated according to the following equation:

$$k_r = \phi_{\text{Phos.}} / \tau_{\text{Phos.}} \quad (1)$$

Moreover, the non-radiative rate constant of Al/Phe-PMs is calculated based on the following equation:

$$k_{\text{nr}} = (1 - \phi_{\text{Phos.}}) / \tau_{\text{Phos.}} \quad (2)$$

Wherein,  $\phi_{\text{Phos.}}$  refers to the phos. QYs.  $\tau_{\text{Phos.}}$  refers to the phos. lifetime.  $k_r$  refers to the phos. radiative rate constant.  $k_{\text{nr}}$  refers to the non-radiative rate constant.

## Reference:

1. W. Ye, H. Ma, H. Shi, H. Wang, A. Lv, L. Bian, M. Zhang, C. Ma, K. Ling, M. Gu, Y. Mao, X. Yao, C. Gao, K. Shen, W. Jia, J. Zhi, S. Cai, Z. Song, J. Li, Y. Zhang, S. Lu, K. Liu, C. Dong, Q. Wang, Y. Zhou, W. Yao, Y. Zhang, H. Zhang, Z. Zhang, X. Hang, Z. An, X. Liu and W. Huang, *Nat. Mater.*, 2021, **20**, 1539-1544.
2. X. Liu, W. Liu, K. Zuo, J. Zheng, M. Wang and X. Liu, *ACS Sustainable Chem. Eng.*, 2023, **11**, 1809-1819.
3. Y. Xie, Z. Wang, P. Yu, L. Zhang, Y. Geng and J. Zhao, *Adv. Optical Mater.*, 2023, DOI: 10.1002/adom.202301188.
4. Y. Yang, Y. Liang, Y. Zheng, J. A. Li, S. Wu, H. Zhang, T. Huang, S. Luo, C. Liu, G. Shi, F. Sun, Z. Chi and B. Xu, *Angew. Chem. Int. Ed.*, 2022, **61**, e202201820.
5. H. Liu, W. Ye, Y. Mu, H. Ma, A. Lv, S. Han, H. Shi, J. Li, Z. An, G. Wang and W. Huang, *Adv. Mater.*, 2022, **34**, 2107612.
6. D. Li, J. Yang, M. M. Fang, B. Z. Tang and Z. Li, *Sci Adv*, 2022, **8**, eabl8392.
7. B. Han, X. Lei, D. Li, Q. Liu, Y. Chen, J. Wang and G. He, *Adv. Optical Mater.*, 2023, **11**, 2202293.
8. Q. Gao, M. Shi, M. Chen, X. Hao, G. Chen, J. Bian, B. Lü, J. Ren and F. Peng, *Small*, 2023, DOI: 10.1002/sml.202309131.
9. S. Xu, W. Wang, H. Li, J. Zhang, R. Chen, S. Wang, C. Zheng, G. Xing, C. Song and W. Huang, *Nat. Commun.*, 2020, **11**, 4802.
10. Y. Zhang, Y. Su, H. Wu, Z. Wang, C. Wang, Y. Zheng, X. Zheng, L. Gao, Q. Zhou, Y. Yang, X. Chen, C. Yang and Y. Zhao, *J. Am. Chem. Soc.*, 2021, **143**, 13675-13685.
